# Supplementary material for: Novel benzodithiophene-TTBTBTT copolymers: synthesis and investigation in organic and perovskite solar cells
Source: Royal Society of Chemistry journal article supplement (doi:10.1039/d2se00463a), 2022-01-01
Supplement: d2se00463a1.pdf [file d2se00463a1.pdf]

Supporting Information

**Novel benzodithiophene-TBTBT copolymers: synthesis and investigation in organic and perovskite solar cells**

Ekaterina A. Komissarova<sup>a</sup>, Sergei A. Kuklin<sup>a,b</sup>, Andrey V. Maskaev<sup>a</sup>, Alina F. Latypova<sup>a</sup>, Petr M. Kuznetsov<sup>a</sup>, Nikita A. Emelianov<sup>a</sup>, Sergei L. Nikitenko<sup>a</sup>, Ilya V. Martynov<sup>a</sup>, Ilya E. Kuznetsov<sup>a</sup>, Alexander V. Akkuratov<sup>a</sup>, Lyubov A. Frolova<sup>a</sup>, Pavel A. Troshin<sup>c,a</sup>

<sup>a</sup>Institute for Problems of Chemical Physics of RAS, Acad. Semenov str. 1, Chernogolovka 142432, Russia

<sup>b</sup>A. N. Nesmeyanov Institute of Organoelement Compounds of RAS, Vavilova St. 28, Moscow 119991, Russia

<sup>c</sup>Faculty of Chemistry, Silesian University of Technology, Strzody 9, 44-100 Gliwice, Poland

**Table of contents**

|                                                                                                                                                                                                                                                                       |    |
|-----------------------------------------------------------------------------------------------------------------------------------------------------------------------------------------------------------------------------------------------------------------------|----|
| <b>Fig. S1</b> Cyclic voltammograms of polymers <b>P1-P8</b> .....                                                                                                                                                                                                    | 2  |
| <b>Fig. S2</b> Absorption spectra of <b>P3</b> , <b>P5</b> , <b>P7</b> and <b>P8</b> in solution (chlorobenzene) .....                                                                                                                                                | 2  |
| <b>Fig. S3</b> <sup>1</sup> H NMR spectrum of <b>P5</b> in CDCl <sub>3</sub> .....                                                                                                                                                                                    | 3  |
| <b>Fig. S4</b> <sup>1</sup> H NMR spectrum of <b>P7</b> in CDCl <sub>3</sub> .....                                                                                                                                                                                    | 3  |
| <b>Fig. S5</b> TG curves of polymers <b>P1-P8</b> .....                                                                                                                                                                                                               | 4  |
| <b>Table S1</b> Processing conditions and performance characteristics of organic solar cells based on polymers <b>P1-P8</b> .....                                                                                                                                     | 5  |
| <b>Fig. S6</b> J-V characteristics (a-h) of OSCs based on <b>P1</b> (a), <b>P2</b> (b), <b>P3</b> (c), <b>P4</b> (d), <b>P5</b> (e), <b>P6</b> (f), <b>P7</b> (g) and <b>P8</b> (h) .....                                                                             | 8  |
| <b>Fig. S7</b> EQE spectra (a-h) of OSCs based on <b>P1</b> (a), <b>P2</b> (b), <b>P3</b> (c), <b>P4</b> (d), <b>P5</b> (e), <b>P6</b> (f), <b>P7</b> (g) and <b>P8</b> (h) .....                                                                                     | 9  |
| <b>Fig. S8</b> Topographic images of composite films based on polymers <b>P1-P8</b> (left) and the results of IR s-SNOM mapping on the characteristic IR absorption frequencies of the conjugated polymer (center) and the acceptor material (right) .....            | 10 |
| <b>Fig. S9</b> Topographic images of composite films based on polymers <b>P5</b> (left) and the results of IR s-SNOM mapping on the characteristic IR absorption frequencies of the conjugated polymer (center) and the acceptor material (right) .....               | 11 |
| <b>Table S2</b> Processing conditions and parameters of ITO/SnO <sub>x</sub> /PCBA/MAPbI <sub>3</sub> /HTM/VO <sub>y</sub> /Ag perovskite solar cells based on polymers <b>P1-P8</b> and reference PTA applied as hole transport materials .....                      | 12 |
| <b>Fig. S10</b> AFM topography images of <b>P5</b> films deposited atop perovskite absorber layer (left) and IR s-SNOM mapping results at the characteristic IR absorption frequencies of conjugated polymer (center) and MAPbI <sub>3</sub> perovskite (right) ..... | 13 |

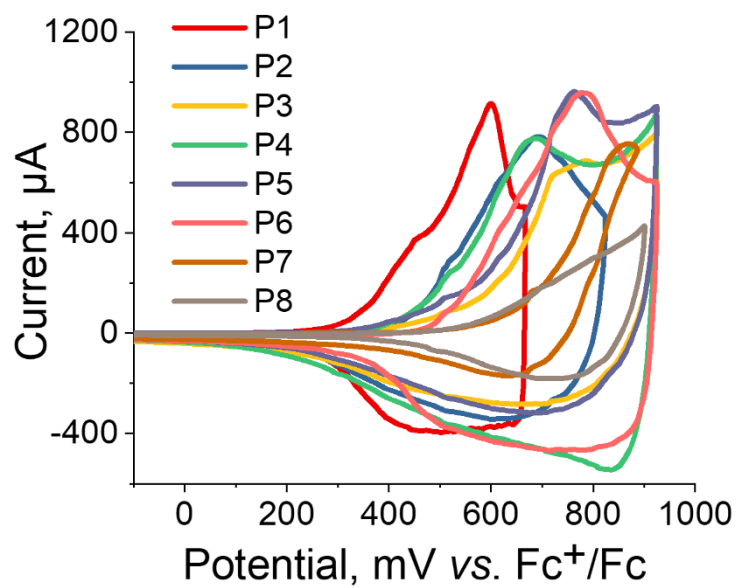

**Fig. S1** Cyclic voltammograms of polymers **P1-P8**

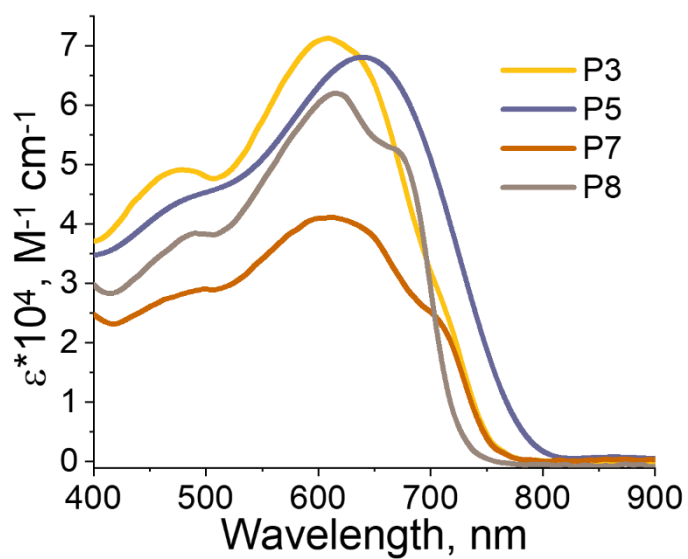

**Fig. S2** Absorption spectra of **P3, P5, P7** and **P8** in solution (chlorobenzene)

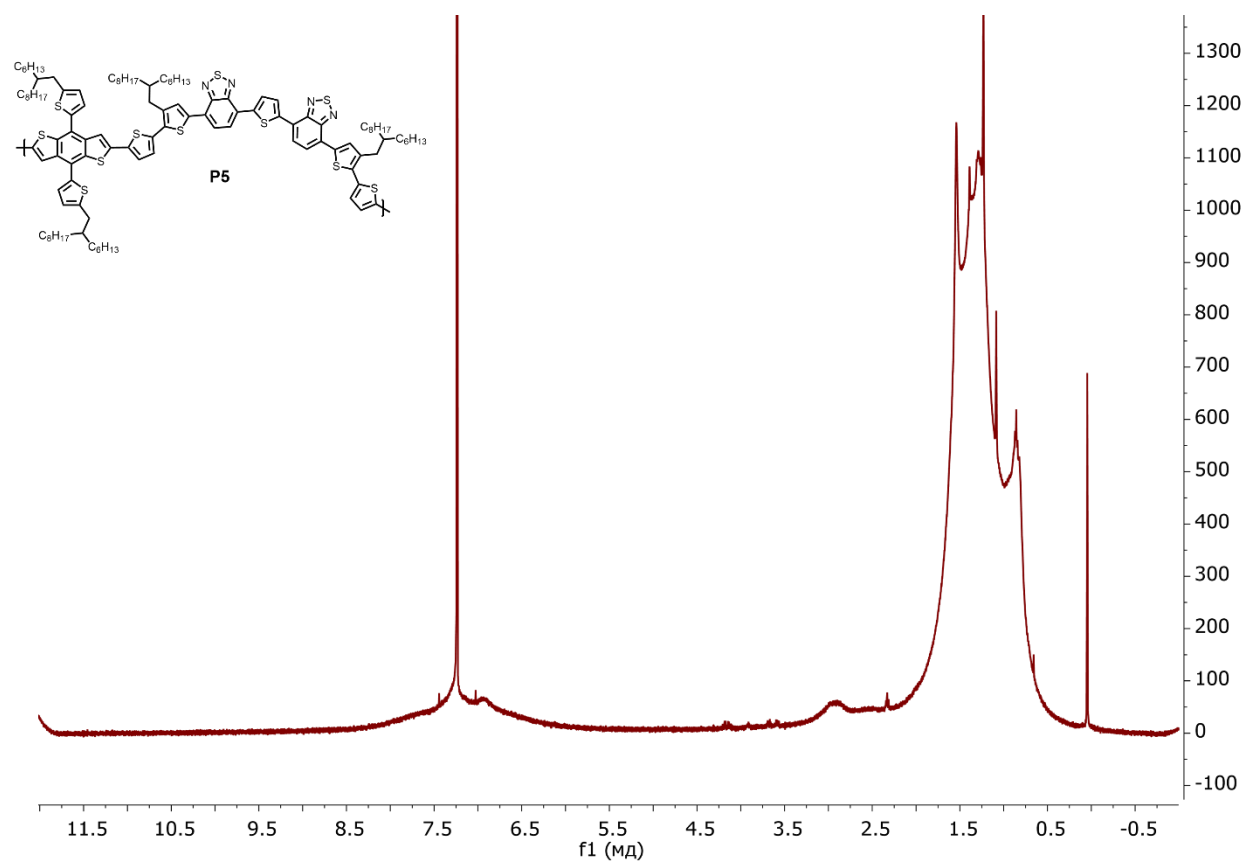

**Fig. S3** <sup>1</sup>H NMR spectrum of P5 in CDCl<sub>3</sub>

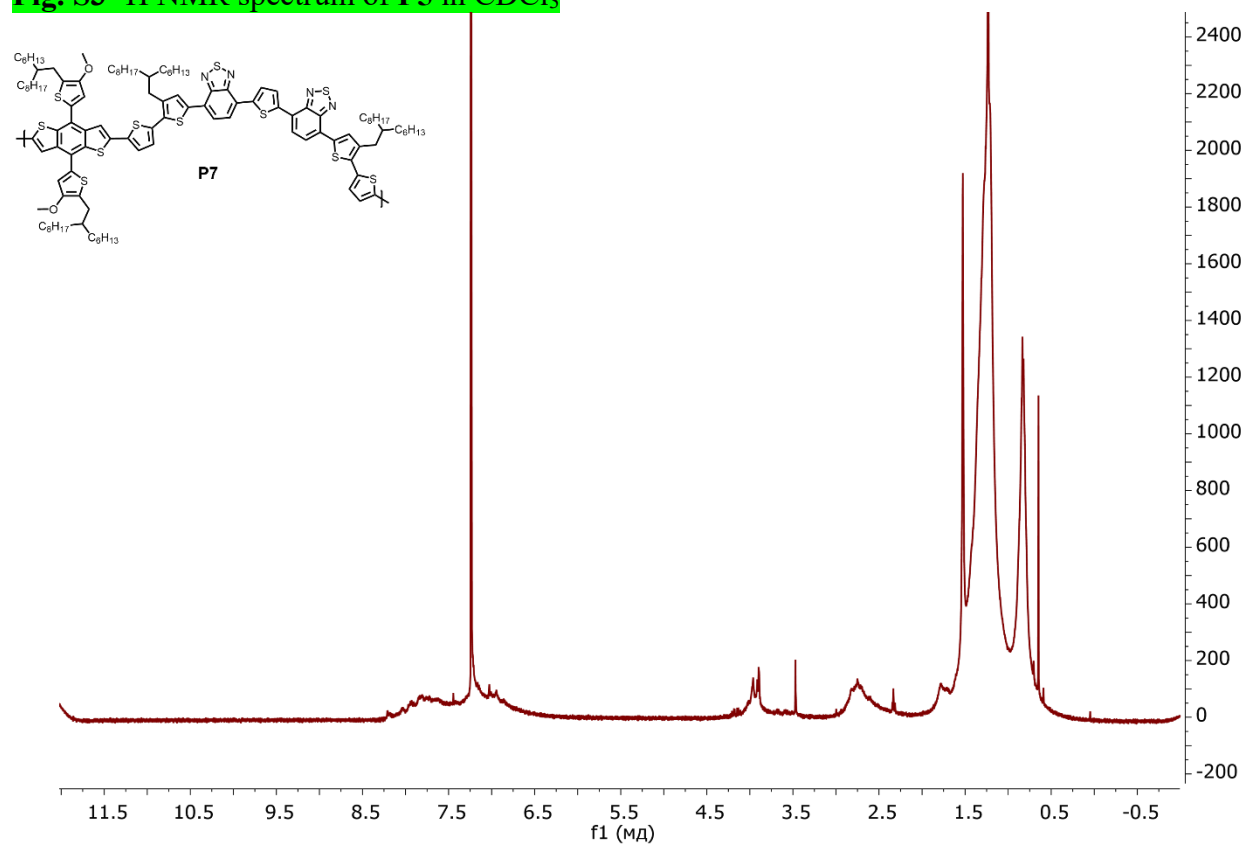

**Fig. S4** <sup>1</sup>H NMR spectrum of P7 in CDCl<sub>3</sub>

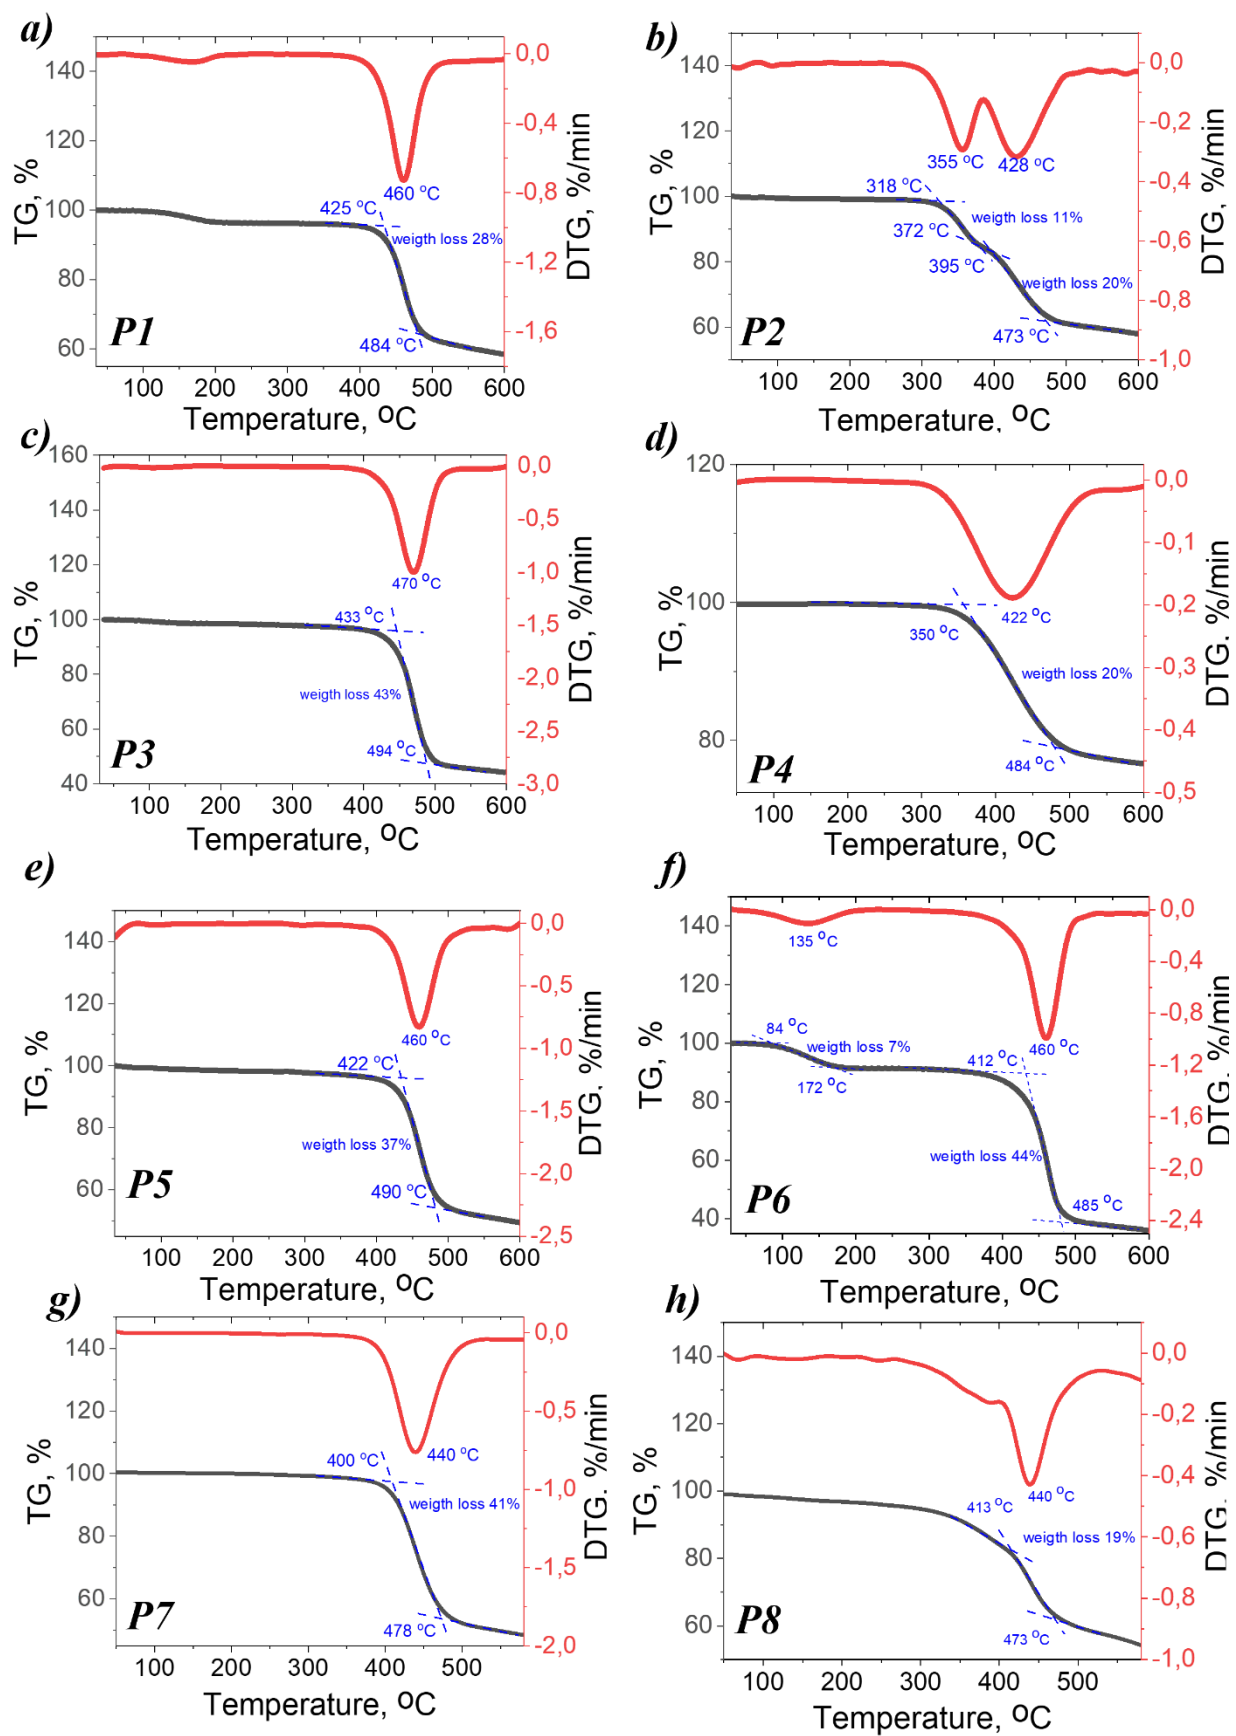

Fig. S5 TG curves of polymers P1-P8

**Table S1** Processing conditions and performance characteristics of organic solar cells based on polymers **P1-P8**

| Donor D   | Acceptor A | D : A ratio w/w | Additive | Conditions                                                                                                                            | V <sub>oc</sub> , mV | J <sub>sc</sub> , mA/cm <sup>2</sup> | FF, % | η, % |
|-----------|------------|-----------------|----------|---------------------------------------------------------------------------------------------------------------------------------------|----------------------|--------------------------------------|-------|------|
| <b>P1</b> | [60]PCBM   | 1:1             | -        | 10 mg/ml in 1,2,4-TCB <sup>1</sup> at 190°C. DB <sup>2</sup> at 120°C, blade speed 30 mm/s.                                           | 362                  | 10.83                                | 29    | 1.13 |
|           |            | 1:2             | -        |                                                                                                                                       | 614                  | 10.00                                | 39    | 2.40 |
|           |            | 1:2             | CN / 1%  |                                                                                                                                       | 550                  | 12.97                                | 35    | 2.52 |
|           |            | 1:2             | DPE / 1% |                                                                                                                                       | 657                  | 11.54                                | 47    | 3.60 |
|           |            | 1:2             | DIO / 1% |                                                                                                                                       | 647                  | 13.06                                | 57    | 4.82 |
|           |            | 1:2             | ODT / 1% |                                                                                                                                       | 679                  | 13.16                                | 55    | 4.88 |
| <b>P2</b> | [60]PCBM   | 1:2             | -        | 8 mg/ml in 1,2,4-TCB at 190°C. DB at 110°C, blade speed 40 mm/s.                                                                      | 467                  | 7.5                                  | 31    | 1.1  |
|           |            | 1:1.5           | -        |                                                                                                                                       | 506                  | 7.6                                  | 36    | 1.4  |
|           |            | 1:1.5           | ODT / 1% |                                                                                                                                       | 589                  | 8.9                                  | 45    | 2.4  |
| <b>P3</b> | [60]PCBM   | 1:1             | -        | 10 mg/ml in 1,2,4-TCB at 190°C. SC <sup>3</sup> 800 rpm.                                                                              | 619                  | 8                                    | 47    | 2.3  |
|           |            | 1:1.5           | -        |                                                                                                                                       | 650                  | 10.1                                 | 59    | 3.9  |
|           |            | 1:1.5           | DPE / 1% |                                                                                                                                       | 636                  | 9.9                                  | 67    | 4.2  |
|           | EH-IDTBR   | 1:1             | -        | 10 mg/ml in 1,2,4-TCB at 190°C. SC 800 rpm, annealing at 125°C within 10 min.                                                         | 788                  | 10.5                                 | 48    | 4    |
| <b>P4</b> | [60]PCBM   | 1:2             | -        | 10 mg/ml in 1,2-DCB <sup>4</sup> at. SC 900 rpm                                                                                       | 601                  | 9.3                                  | 44    | 2.5  |
|           |            | 1:1             | -        |                                                                                                                                       | 617                  | 10.6                                 | 53    | 3.5  |
|           |            | 1:1             | -        | 10 mg/ml in 1,2-DCB at. SC 600 rpm                                                                                                    | 614                  | 12.1                                 | 60    | 4.5  |
|           |            | 1:1             | -        | 10 mg/ml in 1,2-DCB at. SC 900 rpm, annealing at 95°C within 10 min                                                                   | 614                  | 11.1                                 | 54    | 3.7  |
|           |            | 1:1             | -        | 10 mg/ml in 1,2-DCB at. SC 900 rpm, annealing at 95°C within 10 min, SVA <sup>5</sup> in CH <sub>2</sub> Cl <sub>2</sub> within 1 min | 593                  | 11.8                                 | 60    | 4.2  |
|           |            | 1:1             | CN / 1%  | 10 mg/ml in 1,2-DCB at. SC 900 rpm, annealing at 95°C within 10 min, SVA in 1% CN                                                     | 593                  | 12.1                                 | 60    | 4.3  |
|           | EH-IDTBR   | 1:1             | -        | 10 mg/ml in 1,2-DCB at 160°C. SC, 600 rpm                                                                                             | 816                  | 8.8                                  | 34    | 2.4  |
|           | O-IDTBR    | 1:1.5           | -        | 10 mg/ml in 1,2-DCB at 160°C. SC, 600 rpm                                                                                             | 853                  | 8.8                                  | 41    | 3.1  |
| <b>P5</b> | [60]PCBM   | 1:1             | -        |                                                                                                                                       | 571                  | 9.2                                  | 41    | 2.2  |

| Donor D   | Acceptor A | D : A ratio w/w | Additive | Conditions                                                                                      | Voc, mV | Jsc, mA/cm <sup>2</sup> | FF, % | $\eta$ , % |
|-----------|------------|-----------------|----------|-------------------------------------------------------------------------------------------------|---------|-------------------------|-------|------------|
|           |            | 1:1.5           | -        | 10 mg/ml in 1,2-DCB at 160°C. DB at 80°C, blade speed 15 mm/s, annealing at 95°C within 10 min  | 635     | 10                      | 61    | 3.9        |
|           |            | 1:1.5           | DIO / 1% | 10 mg/ml in 1,2-DCB at 160°C. DB at 80°C, blade speed 50 mm/s, annealing at 95°C within 10 min  | 617     | 10.7                    | 58    | 3.8        |
|           | ITIC-M     | 1:1             | -        | 10 mg/ml in 1,2-DCB at 160°C. DB at 80°C, blade speed 15 mm/s, annealing at 125°C within 10 min | 737     | 14.5                    | 50    | 5.3        |
|           | EH-IDTBR   | 1:1             | -        |                                                                                                 | 888     | 12                      | 49    | 5.3        |
| <b>P6</b> | [60]PCBM   | 1:2             | -        | 10 mg/ml in 1,2,4-TCB at 190°C. DB at 120°C, blade speed 15 mm/s.                               | 757     | 7.30                    | 64    | 3.54       |
|           |            | 1:1.5           | -        |                                                                                                 | 747     | 8.12                    | 63    | 3.82       |
| <b>P7</b> | [60]PCBM   | 1:1             | -        | 10 mg/ml in 1,2-DCB at 160°C. DB at 25°C, blade speed 50 mm/s, annealing at 95°C within 10 min  | 717     | 4                       | 33    | 1          |
|           |            | 1:1.5           | -        |                                                                                                 | 754     | 5.3                     | 34    | 1.4        |
|           |            | 1:1.5           | ODT / 1% | 10 mg/ml in 1,2-DCB at. SC 900 rpm, annealing at 95°C within 10 min                             | 731     | 11.6                    | 42    | 3.6        |
|           |            | 1:1.5           | DPE / 1% |                                                                                                 | 752     | 10.3                    | 46    | 3.6        |
|           | EH-IDTBR   | 1:1             | -        | 10 mg/ml in 1,2-DCB at. SC 1000 rpm, annealing at 125°C within 10 min                           | 937     | 8.9                     | 43    | 3.6        |
| <b>P8</b> | [60]PCBM   | 1:1.5           | -        | 8 mg/ml in 1,2-DCB at 160°C. DB at 25°C, blade speed 50 mm/s, annealing at 95°C within 10 min   | 783     | 10.1                    | 39    | 3.1        |
|           |            | 1:1             | -        |                                                                                                 | 822     | 11.8                    | 49    | 4.7        |
|           |            | 1:1             | -        | 10 mg/ml in 1,2-DCB at 160°C. DB at 25°C, blade speed 20 mm/s, annealing at 95°C within 10 min  | 849     | 12.6                    | 45    | 4.8        |
|           |            | 1:1             | -        | 10 mg/ml in 1,2-DCB at 160°C. DB                                                                | 811     | 11.8                    | 53    | 5.1        |

| Donor D | Acceptor A | D : A ratio w/w | Additive | Conditions                                                                                 | V <sub>oc</sub> , mV | J <sub>sc</sub> , mA/cm <sup>2</sup> | FF, % | η, % |
|---------|------------|-----------------|----------|--------------------------------------------------------------------------------------------|----------------------|--------------------------------------|-------|------|
|         |            |                 |          | at 25°C, blade speed 20 mm/s                                                               |                      |                                      |       |      |
|         |            | 1:1             | ODT / 1% |                                                                                            | 824                  | 13.7                                 | 57    | 6.5  |
|         | ITIC-4F    | 1:1             | -        | 10 mg/ml in 1,2-DCB at 160°C. DB at 25°C, blade speed 20 mm/s, SVA in 1% CHCl <sub>3</sub> | 729                  | 9.4                                  | 46    | 3.2  |

<sup>1</sup>1,2,4-Trichlorobenzene; <sup>2</sup>Doctor Blade; <sup>3</sup>spin-coating; <sup>4</sup>1,2-dichlorobenzene; <sup>5</sup>solvent vapor annealing

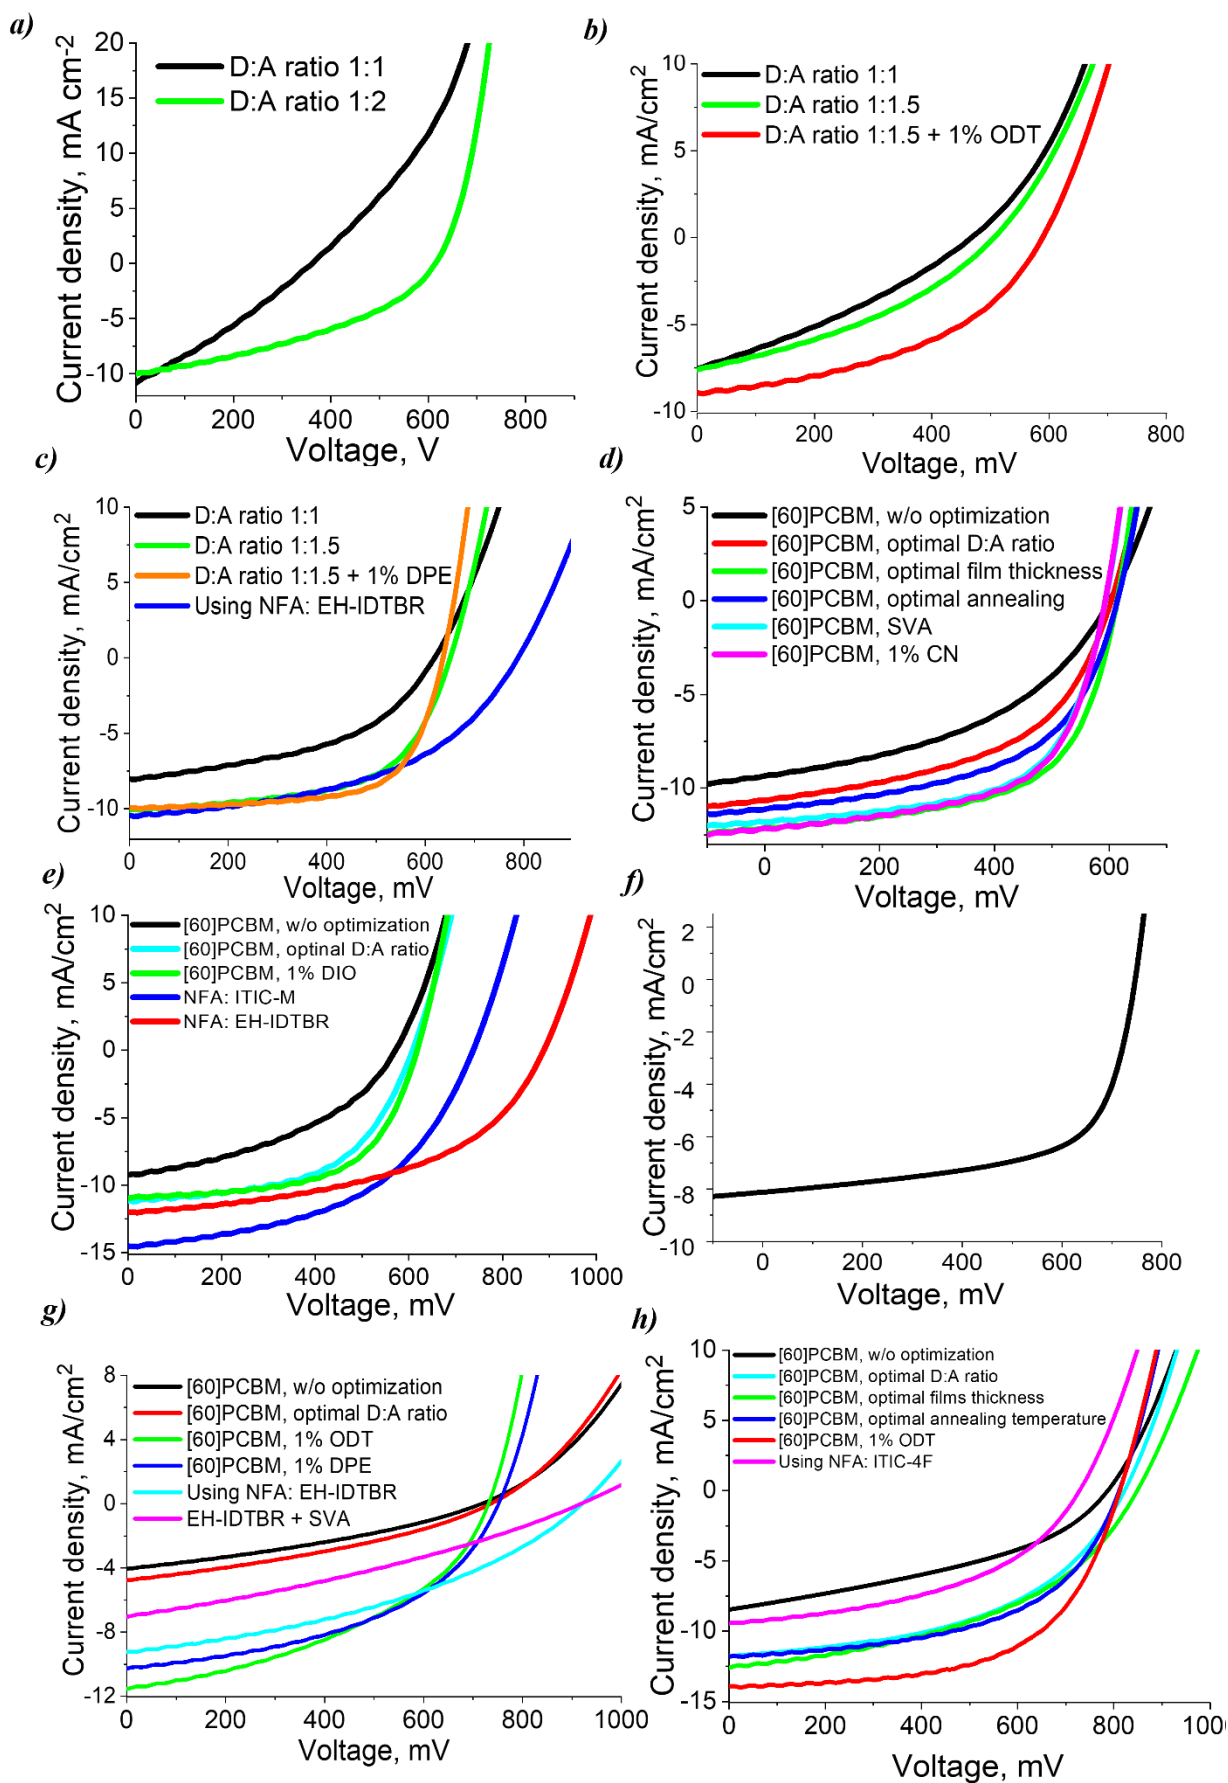

**Fig. S6** J-V characteristics (a-h) of OSCs based on P1 (a), P2 (b), P3(c), P4(d), P5 (e), P6 (f), P7 (g) and P8 (h)



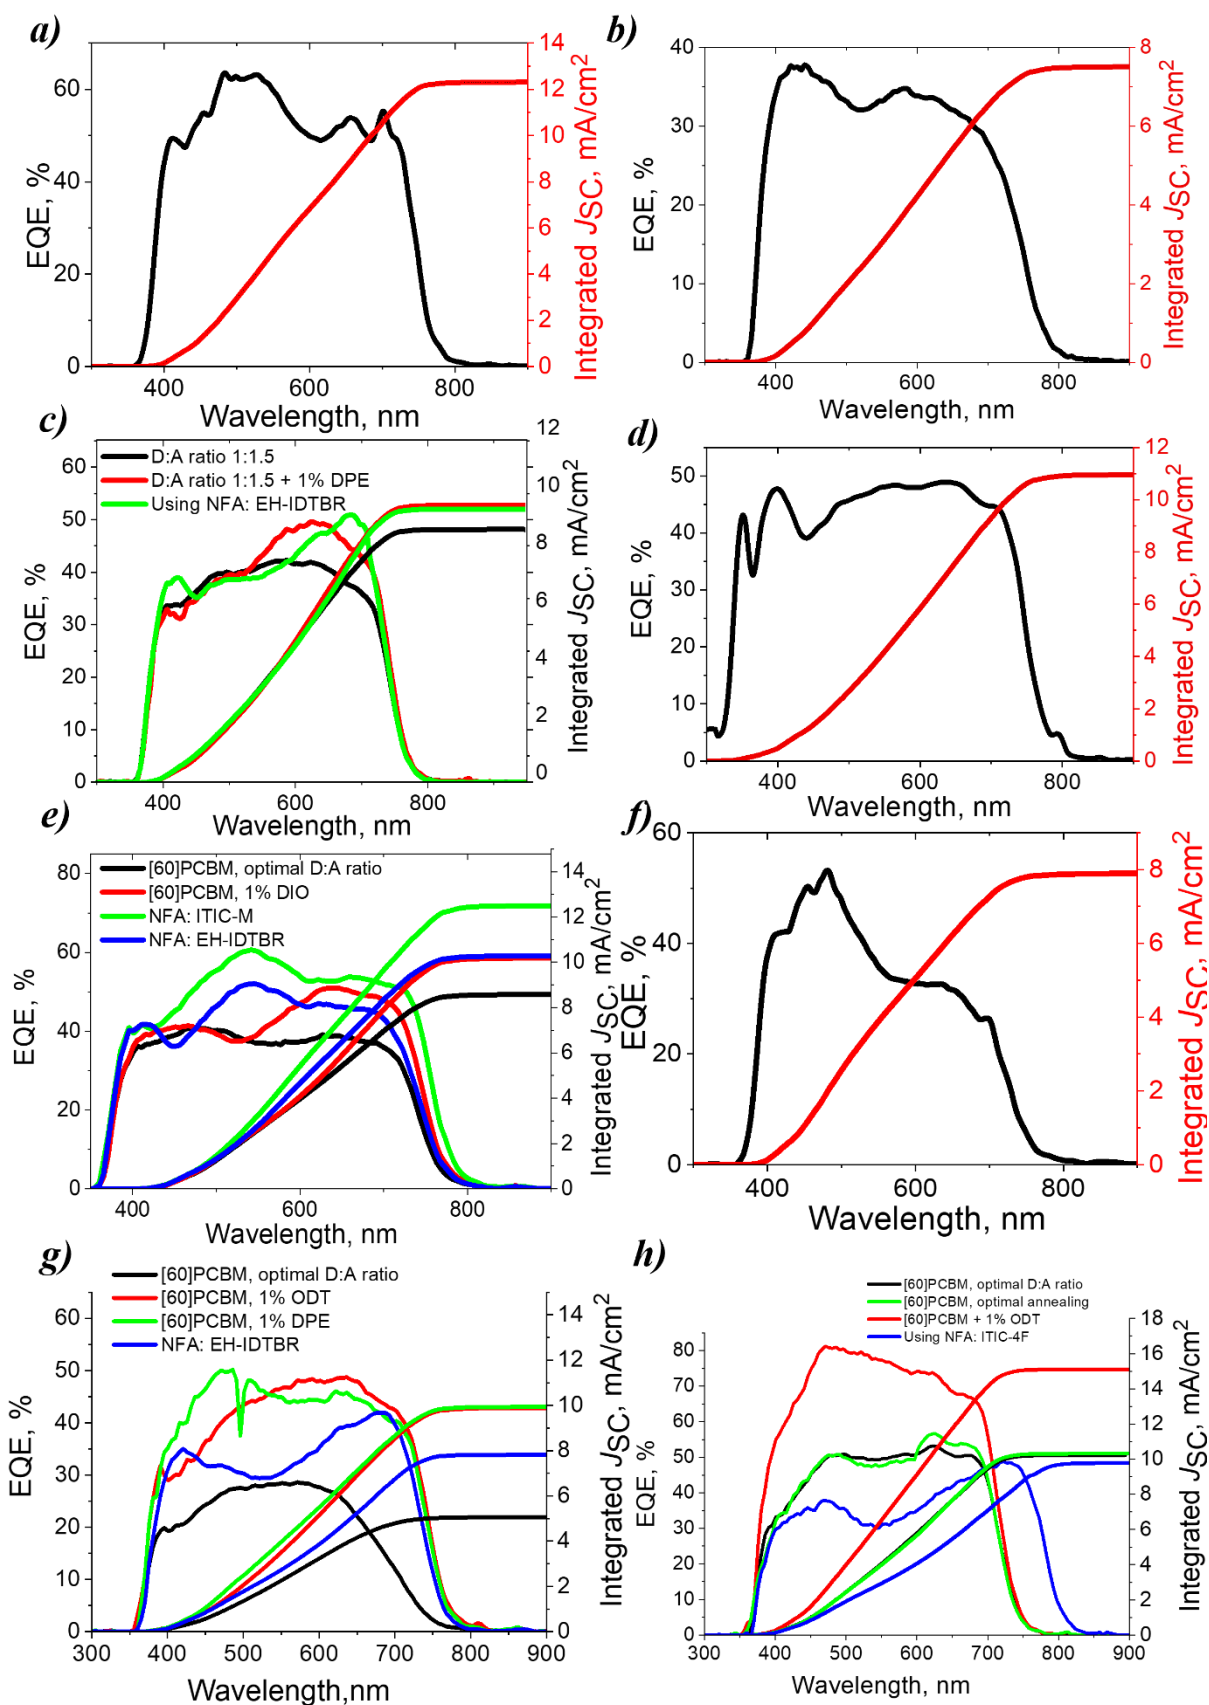

**Fig. S7** EQE spectra (a-h) of OSCs based on **P1** (a), **P2** (b), **P3**(c), **P4**(d), **P5** (e), **P6** (f), **P7** (g) and **P8** (h)

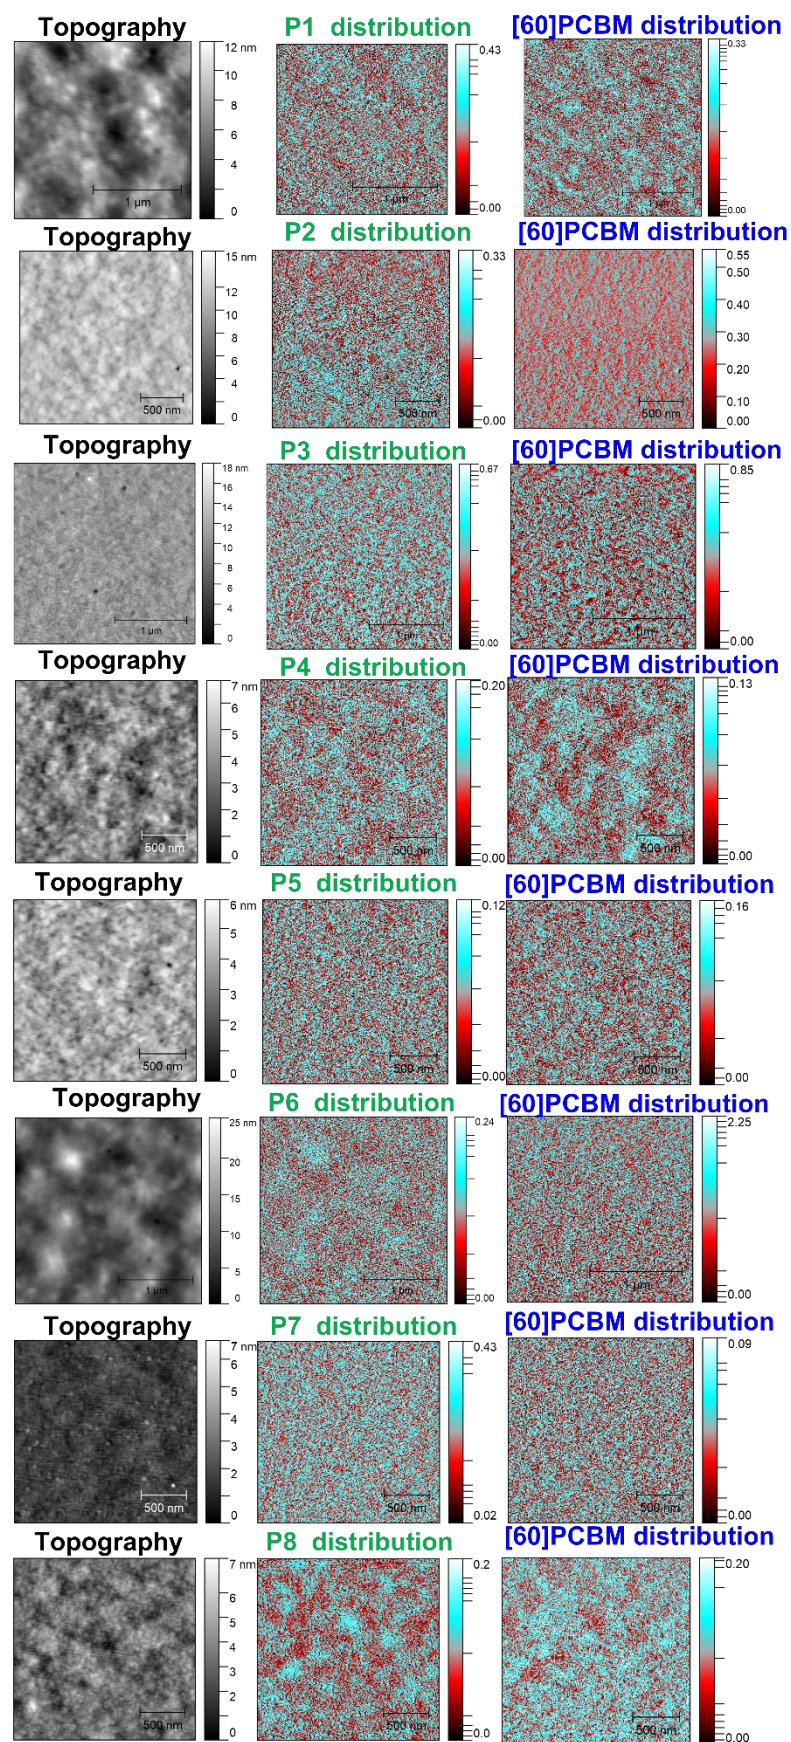

**Fig. S8** Topographic images of composite films based on polymers **P1-P8** (left) and the results of IR s-SNOM mapping on the characteristic IR absorption frequencies of the conjugated polymer (center) and the acceptor material (right)

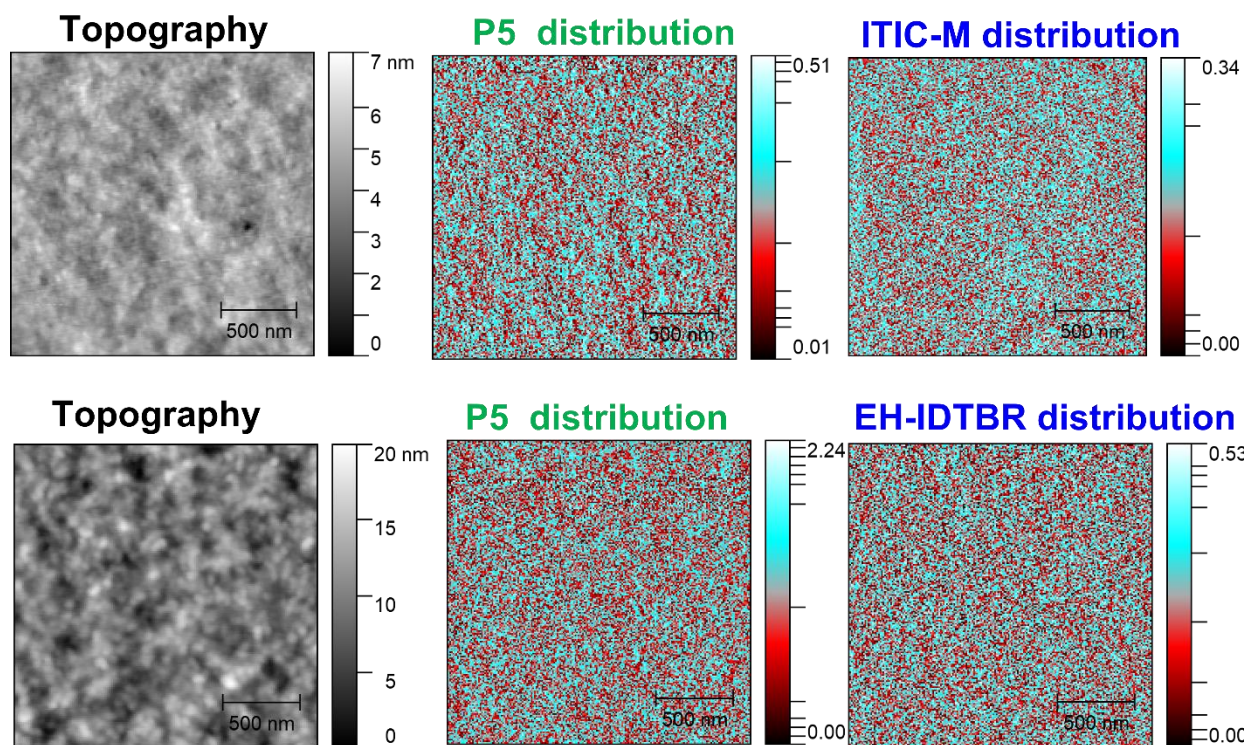

**Fig. S9** Topographic images of composite films based on polymers **P5** (left) and the results of IR s-SNOM mapping on the characteristic IR absorption frequencies of the conjugated polymer (center) and the acceptor material (right)

**Table S2** Processing conditions and parameters of ITO/SnO<sub>x</sub>/PCBA/MAPbI<sub>3</sub>/HTM/VO<sub>y</sub>/Ag perovskite solar cells based on polymers **P1-P8** and reference PTA applied as hole transport materials

| HTL        | Conditions                             | Scanning direction | V <sub>OC</sub> , V | J <sub>sc</sub> , mA cm <sup>-2</sup> | FF, % | PCE, % |
|------------|----------------------------------------|--------------------|---------------------|---------------------------------------|-------|--------|
| <b>P1</b>  | 5 mg/ml in 1,3,5-TCB, 180 °C, 1000 rpm | Forward            | 1.01                | 22.6                                  | 72.5  | 16.6   |
|            |                                        | Reverse            | 1.01                | 22.6                                  | 71.6  | 16.4   |
| <b>P2</b>  | 3 mg/ml in 1,2-DCB, 85 °C, 1000 rpm    | Forward            | 0.91                | 23.4                                  | 63.0  | 13.4   |
|            |                                        | Reverse            | 0.89                | 23.4                                  | 64.0  | 12.8   |
| <b>P3</b>  | 7 mg/ml in CB, 25 °C, 1000 rpm         | Forward            | 0.99                | 23.4                                  | 73.3  | 17.0   |
|            |                                        | Reverse            | 0.97                | 23.3                                  | 63.5  | 14.5   |
| <b>P4</b>  | 5 mg/ml in CB, 65-70 °C, 1000 rpm      | Forward            | 1.07                | 23.5                                  | 64.6  | 16.3   |
|            |                                        | Reverse            | 1.06                | 23.4                                  | 67.1  | 16.7   |
| <b>P5</b>  | 10 mg/ml in CB, 95-100 °C, 5000 rpm    | Forward            | 1.10                | 22.6                                  | 70.4  | 17.5   |
|            |                                        | Reverse            | 1.11                | 22.5                                  | 70.5  | 17.6   |
| <b>P6</b>  | 5 mg/ml in CB, 65-70 °C, 1000 rpm      | Forward            | 0.99                | 23.5                                  | 49.3  | 11.5   |
|            |                                        | Reverse            | 0.99                | 23.4                                  | 42.1  | 10.1   |
| <b>P7</b>  | 6 mg/ml in CB, 25 °C, 1000 rpm         | Forward            | 1.08                | 23.5                                  | 66.0  | 16.9   |
|            |                                        | Reverse            | 1.08                | 23.5                                  | 65.0  | 16.8   |
| <b>P8</b>  | 7 mg/ml in CB, 25 °C, 2000 rpm         | Forward            | 1.07                | 23,5                                  | 75.0  | 18.8   |
|            |                                        | Reverse            | 1.06                | 23,5                                  | 72.0  | 17.9   |
| <b>PTA</b> | 6 mg/ml in CB, 25 °C, 1000 rpm         | Forward            | 1.04                | 23.4                                  | 67.8  | 16.5   |
|            |                                        | Reverse            | 1.03                | 23.3                                  | 64.9  | 15.5   |

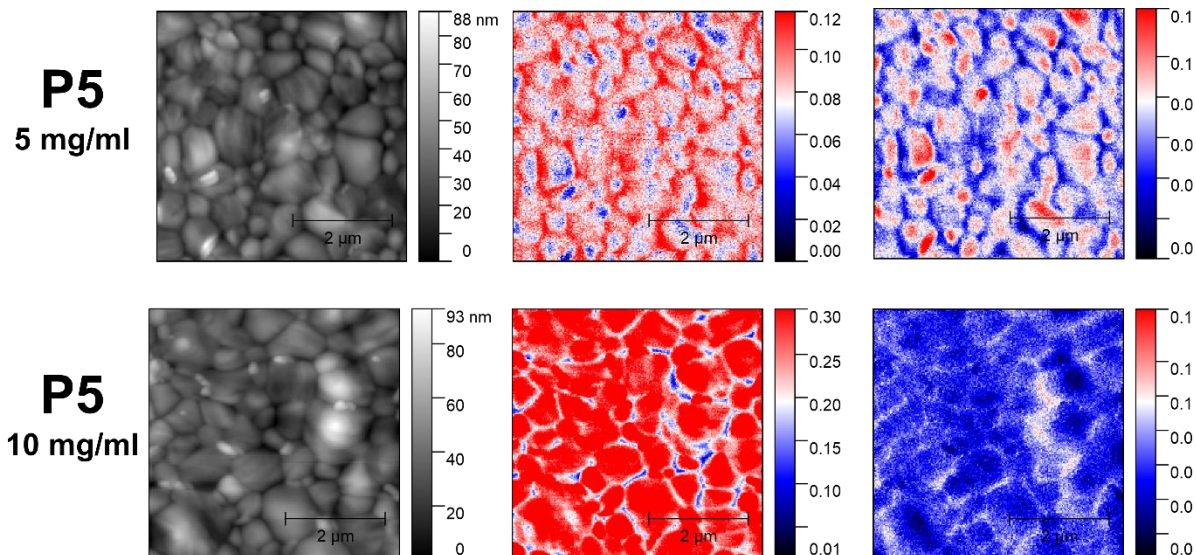

**Fig. S10** AFM topography images of **P5** films deposited atop perovskite absorber layer (left) and IR s-SNOM mapping results at the characteristic IR absorption frequencies of conjugated polymer (center) and MAPbI<sub>3</sub> perovskite (right)
